# Supplementary material
Source: PubMed Central journal article supplement (PMC6390848)

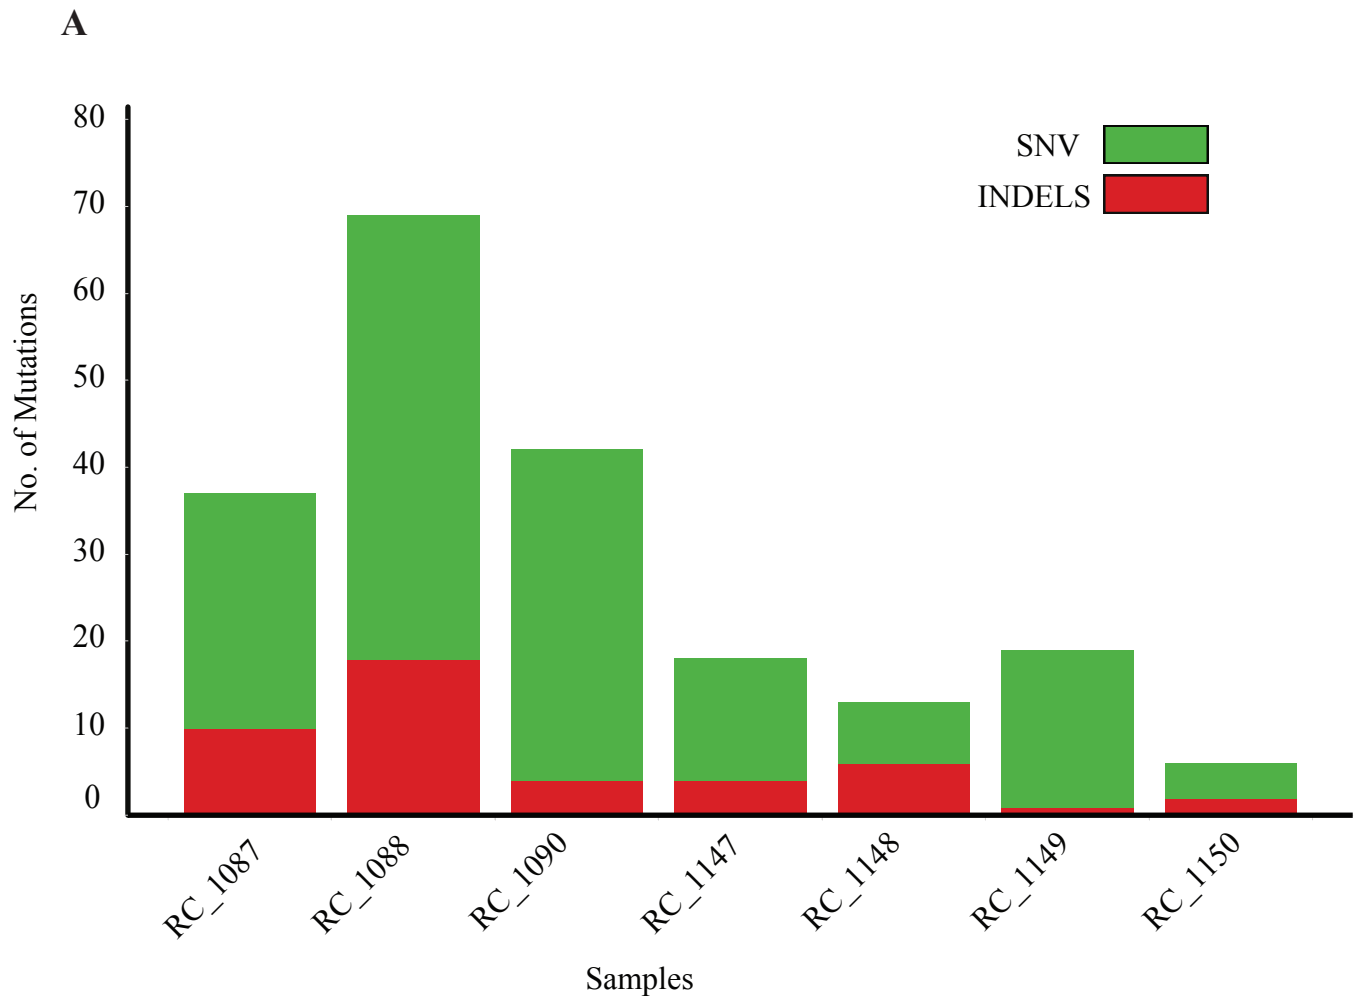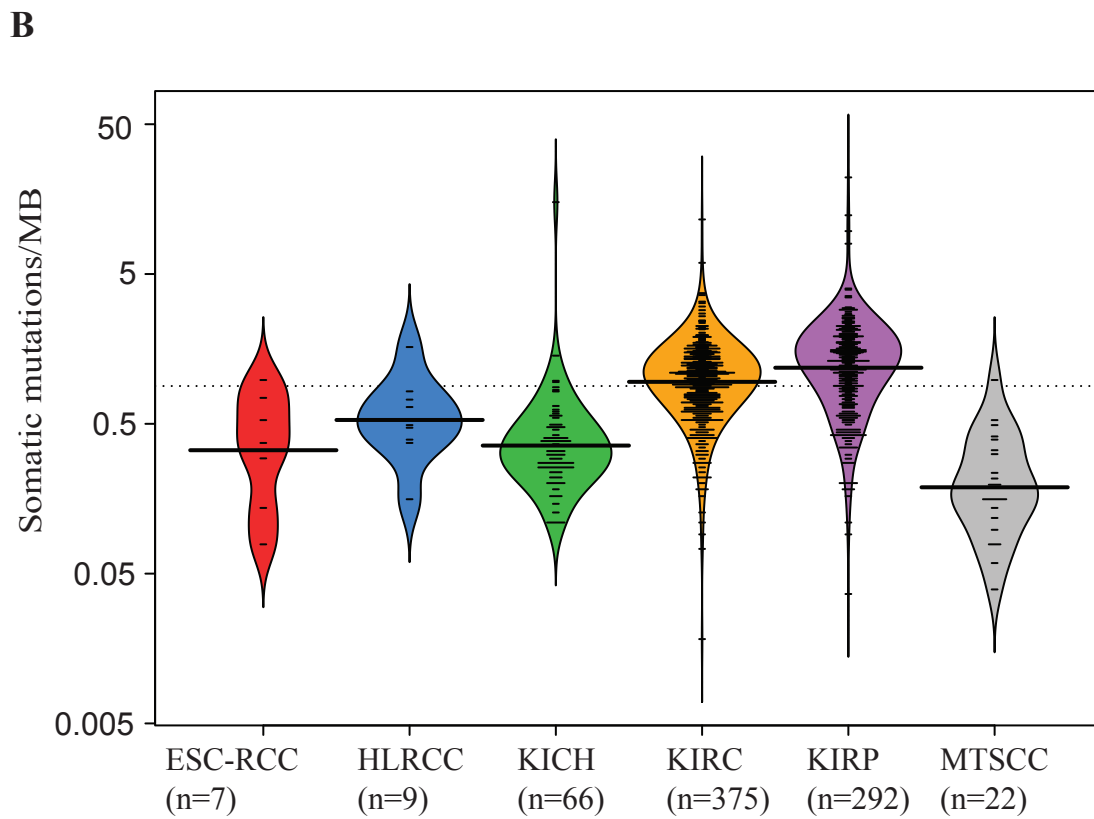

Supplement: NIHMS1010414-supplement-1.pdf [file NIHMS1010414-supplement-1.pdf]
